# Supplementary material for: Near-Infrared Dye-Labeled Anti-Prostate Stem Cell Antigen Minibody Enables Real-Time Fluorescence Imaging and Targeted Surgery in Translational Mouse Models
Source: Oxford University Press journal article supplement (doi:10.1158/1078-0432.ccr-18-1382), 2018-10-09
Supplement: 10780432ccr181382-sup-ccr-18-1382r1_supplementary_figures_zhang_et_al_103118.docx [file 10780432ccr181382-sup-ccr-18-1382r1_supplementary_figures_zhang_et_al_103118.docx]

**Supplementary materials for:**

**Near-infrared-dye labeled anti-Prostate Stem Cell Antigen minibody enables real-time fluorescence imaging and targeted surgery in translational mouse models**

Mo Zhang1, 2, Naoko Kobayashi1, Kirstin A. Zettlitz3, Evelyn A. Kono1, Joyce M. Yamashiro1, Wen-Ting K. Tsai3, Ziyue K. Jiang1, Chau P. Tran1, Chung Wang1, Johnny Guan1, Anna M. Wu3, Robert E. Reiter1*

**Affiliations**:

1Department of Urology, David Geffen School of Medicine, University of California Los Angeles, California, USA

2Department of Urology, Shengjing Hospital, China Medical University, Shenyang, China

3Crump Institute for Molecular Imaging, Department of Molecular and Medical Pharmacology, University of California Los Angeles, California, USA

***Correspondence**:

Robert E. Reiter, M.D., M.B.A.

Department of Urology, David Geffen School of Medicine at UCLA

Box 951738, Los Angeles, CA 90095-1738

Phone number: 1 (310) 794-7224

Email: [rreiter@mednet.ucla.edu](mailto:rreiter@mednet.ucla.edu)

Zhanget al.


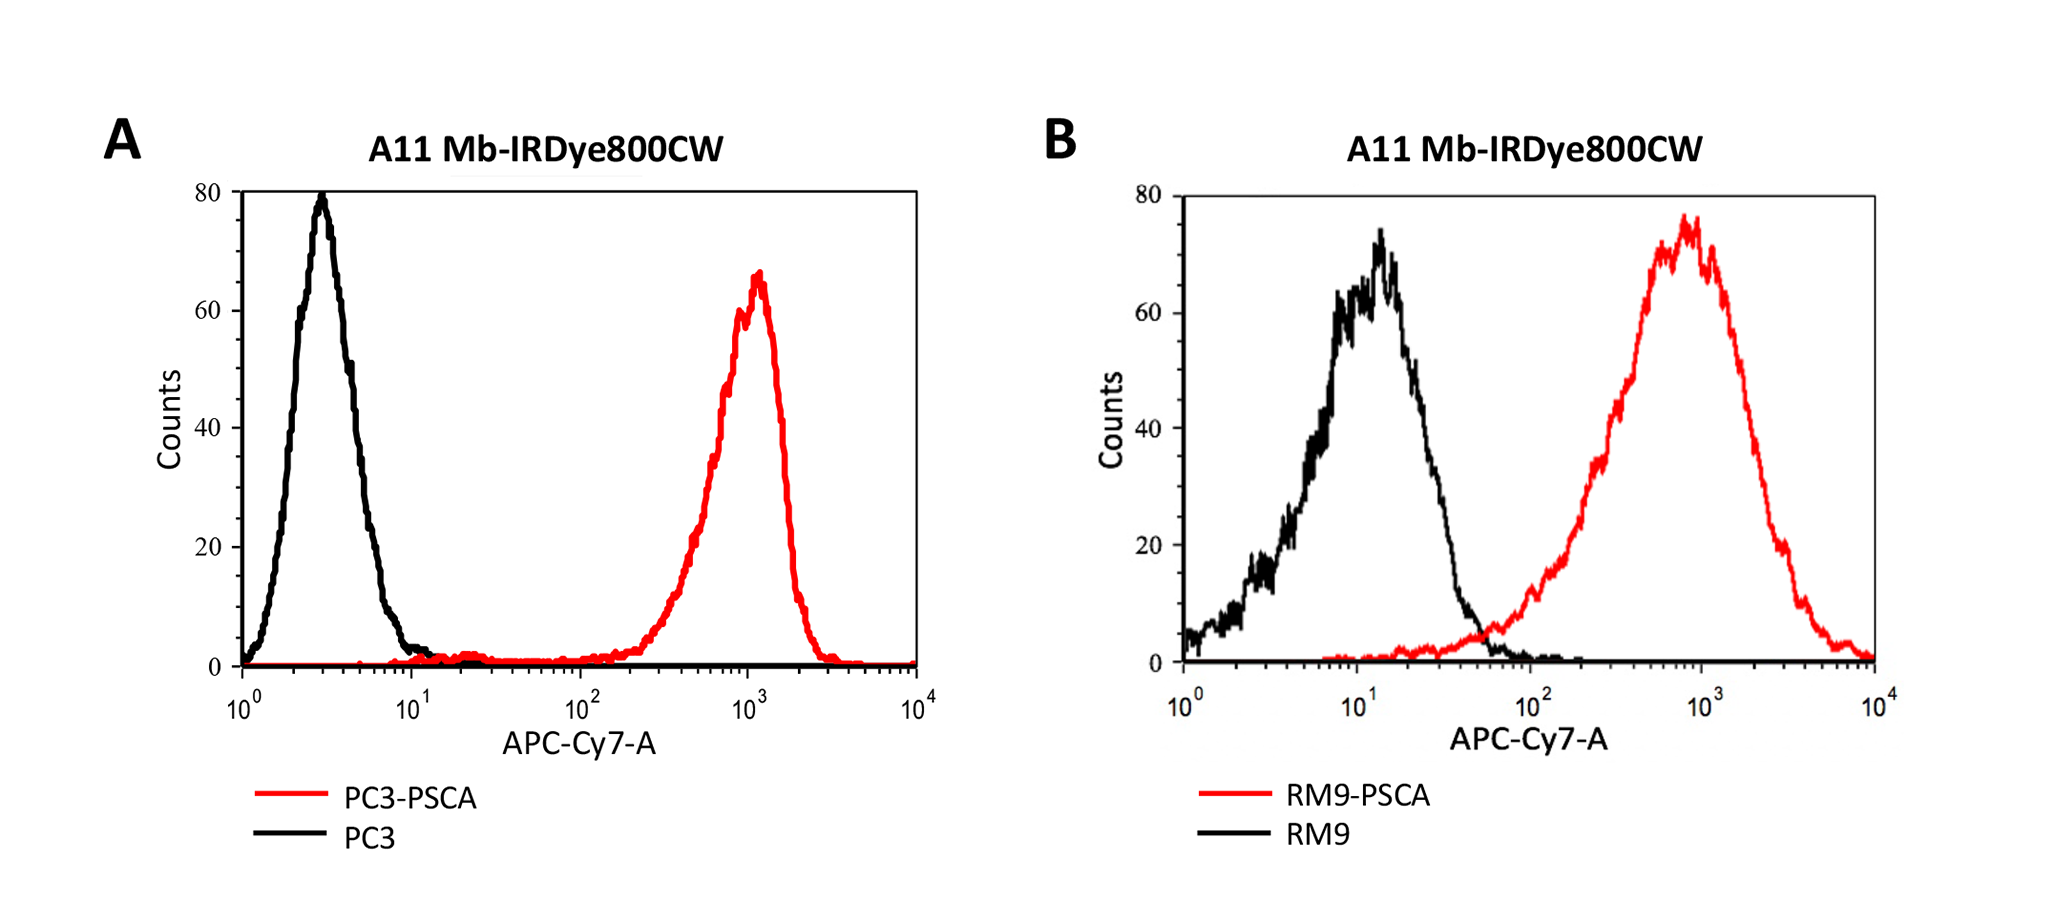


**Supplementary Figure S1**. Flow cytometry analysis demonstrated A11 Mb-IRDye800CW probe binding specifically to PSCA-expressing cells. A, A11 Mb-IRDye800CW binds specifically to PC3-PSCA cells in comparison to PC3. B, A11 Mb-IRDye800CW specifically binds to RM9-PSCA cells, but not to RM9 control cells.

Zhanget al.


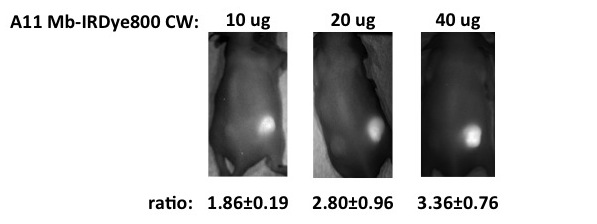


**Supplementary Figure S2**. Fluorescentimaging of the mice bearing subcutaneous 22Rv1-PSCA tumor (right flank) and 22Rv1 with no PSCA (left flank) with the escalating dose of A11 Mb-IRDye800CW. 10, 20, and 40 ug of A11 Mb correspond to the doses at 0.4, 0.8 and 1.6 mg/kg. The ratio of the maximal signal (10^6 photons/cm2/sec) of 22Rv1+PSCA tumor compared to the maximal signal of 22Rv1 tumor was determined for each mouse at sixty six hours post injection of A11 Mb-IRDye800CW at the indicated dose. N=3 for each dose. The average ratio and the SEM are shown on the bottom.

Zhanget al.

**
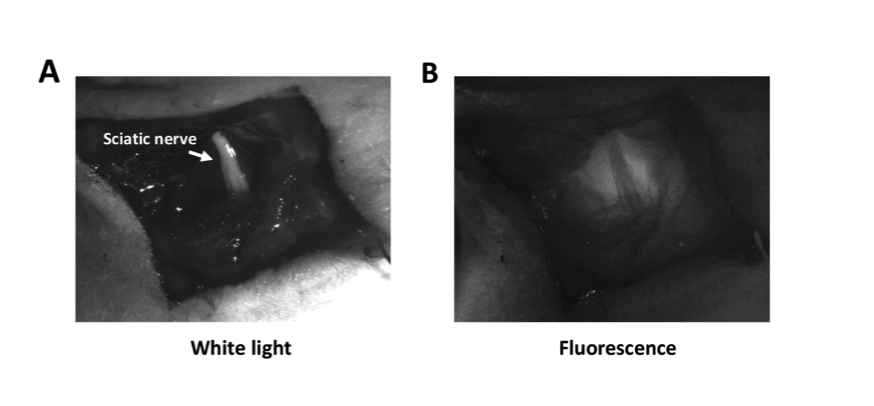
**

**Supplementary Figure S3**. Intraoperative images of 22Rv1-PSCA-Fluc intramuscular xenografts captured under white light (A) and by fluorescent imaging (B) with A11 Mb-IRDye800CW probe. A strong contrast in the fluorescent image distinguished healthy adjacent sciatic nerve from the underlying cancerous tissues.

Zhanget al.

**
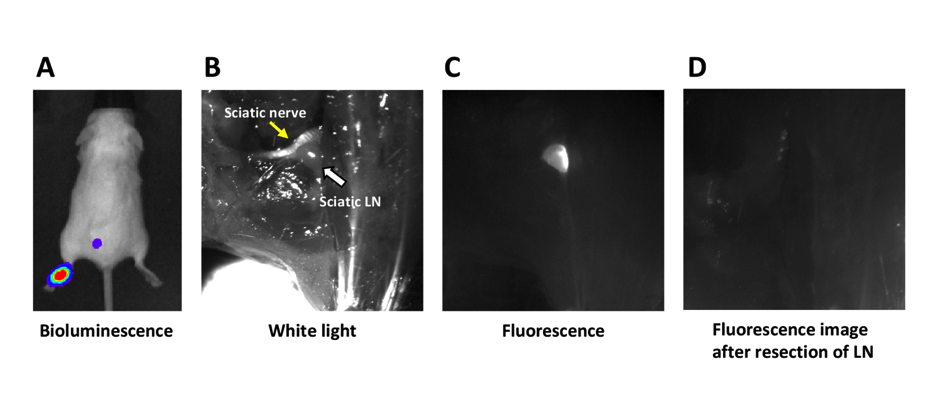
 Supplementary Figure S4.** Intraoperative optical imaging with A11 Mb-IRDye800CW probe enabled detection and resection of metastatic LN under fluorescence guidance. A, PC3-PSCA-Fluc metastasis was detected by BLI in SCID mice. B-D, fluorescence imaging was used in real-time to resect the LN metastasis that was clearly distinguished form the adjacent nerve. White arrow, sciatic LN. Yellow arrow, sciatic nerve.

Zhanget al.

**Supplementary Figure S5.** Generation and characterization of human *PSCA* knock-in (hPSCA-KI) mice. A, schematic for generation of hPSCA-KI mice. B, genotyping *PSCA* alleles by PCR assay. The amplicon for hPSCA allele is 460 bp, and is 576 bp for mouse *Psca*. Lane 1, DNA size marker (size of bands in base pairs indicated on left); Lane 2, h*PSCA*+/+ (h/h*PSCA*); Lane 3, hPSCA+/- (h*PSCA*/m*Psca*); Lane 4, hPSCA-/- (m/m*Psca*). C, h*PSCA* mRNA expression in knock-in mice organs was determined by semi-quantitative RT-PCR. GAPDH mRNA expression was used for loading and RNA quality control.


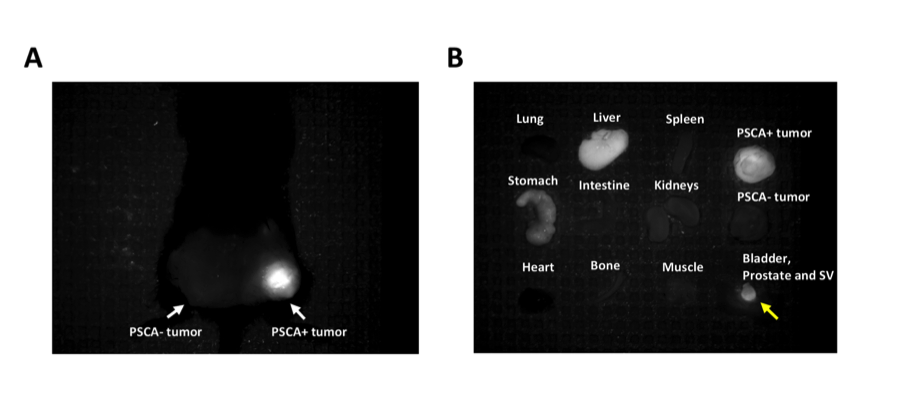


**Supplementary Figure S6.** Fluorescence imaging of the human *PSCA* knock-in (hPSCA-KI) mouse with bilateral subcutaneous tumors. A, A11 Mb-IRDye800CW-fluorescence-imaging of the hPSCA-KI mouse bearing RM9 (left side) and RM9-PSCA-Fluc (right side) subcutaneous tumors. Only PSCA expressing tumor was detected by the fluorescent imaging. The skin was exposed by removing the fur before fluorescent image was taken. B, *ex vivo* fluorescence-imaging of major organs and resected tumors from hPSCA-KI mouse presented in A. In the bottom right corner, the organ showing fluorescent signal is bladder (yellow arrow). SV, seminal vesicle.

Zhanget al.

**
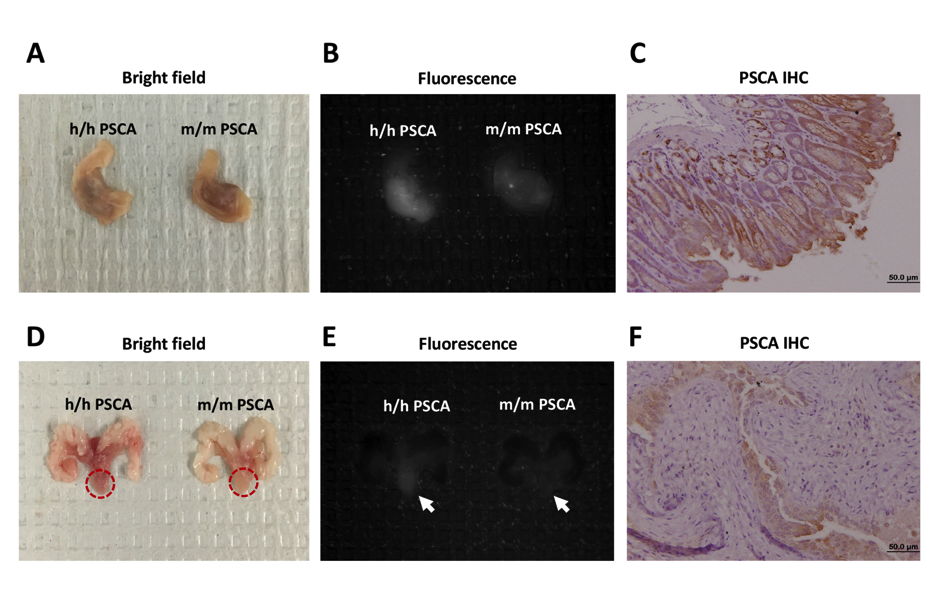
**

**Supplementary Figure S7**. A and B, optical imaging of empty stomachs from human *PSCA* knock-in mouse (hPSCA-KI, h/h*PSCA*) and wild type C57BL/6J mouse (m/m*Psca*), under white light and fluorescence. C, IHC analysis for PSCA shows moderate cytoplasmic PSCA expression in the epithelium of knock-in mouse stomach. D and E, optical imaging of hPSCA-KI and wild type C57BL/6J mouse empty bladders (red dotted line), under white light and A11 Mb-IRDye800CW fluorescence-imaging. F, IHC analysis for PSCA showed weak cytoplasmic staining in the epithelium of knock-in mouse bladder.
